# Supplementary material for: Clinical efficacy of therapeutic footwear with a rigid rocker sole in the prevention of recurrence in patients with diabetes mellitus and diabetic polineuropathy: A randomized clinical trial
Source: PubMed Central journal article supplement (PMC6623964; doi:10.1371/journal.pone.0219537), 2019-07-11
Supplement: pone.0219537.s005.pdf [file pone.0219537.s005.pdf]

13 de octubre de 2016

**CEIC Hospital Clínico San Carlos**

Dra. Mar García Arenillas  
Presidenta del CEIC Hospital Clínico San Carlos

**CERTIFICA**

**1º.** Que el CEIC Hospital Clínico San Carlos en su reunión con acta 10.2/16 ha evaluado la propuesta del promotor referida al estudio:

**Título: "Eficacia clínica del calzado terapéutico con balancín para la prevención de la re-ulceración en los pacientes con Diabetes mellitus y polineuropatía diabética: ensayo clínico prospectivo y aleatorizado".**

**Código Interno:** 16/408-P

**Investigador:** Dr. José Luis Lázaro Martínez

**Versión Protocolo Evaluada:** Versión 2 de octubre de 2016

**Versión Hoja Información al Paciente Evaluada:** GENERAL / versión de 2 de octubre de 2016

**2º.** Considera que

- El estudio se plantea siguiendo los requisitos establecidos en la legislación vigente en cuanto a Investigación Clínica con Productos Sanitarios, y su realización es pertinente.
- Se cumplen los requisitos necesarios de idoneidad del protocolo en relación con los objetivos del estudio y están justificados los riesgos y molestias previsibles para el sujeto.
- La capacidad de los Investigadores y los medios disponibles son apropiados para llevar a cabo el estudio.
- Son adecuados tanto el procedimiento para obtener el consentimiento informado como la compensación prevista para los sujetos por daños que pudieran derivarse de su participación en el estudio.
- El alcance de las compensaciones económicas previstas no interfiere con el respeto a los postulados éticos.

**3º.** Por lo que este CEIC emite un **DICTAMEN FAVORABLE**.

Lo que firmo en Madrid, a 13 de octubre de 2016

  


Fdo.: Dra. Mar García Arenillas  
Presidenta del CEIC Hospital Clínico San Carlos
